# Supplementary material
Source: PubMed Central journal article supplement (PMC8553231)
Supplement: NIHMS1746745-supplement-1.pdf [file NIHMS1746745-supplement-1.pdf]

- T. E. Raghunathan, J. M. Lepkowski, J. Van Hoewyk and P. Solenberger. (2001). "A multivariate technique for multiply imputing missing values using a sequence of regression models", en: *Survey Methodology*, 27(1), 89-95.
- T. E. Raghunathan, P. Solenberger, P. Berglund and J. van Hoewyk. (2016). IVEware: Imputation and Variance Estimation Software (Version 0.3). In. University of Michigan.
- R. Wong and M. Espinoza. (2001). Imputation of non-response on economic variables in the Mexican Health and Aging Study (MHAS/ENASEM) 2001. In.
- R. Wong and M. Espinoza. (2004). Imputation of non-response on economic variables in the Mexican Health and Aging Study (MHAS/ENASEM) 2003. In.
- R. Wong, K. Orozco-Rocha, D. Zhang, M. Michaels-Obregon and C. Gonzalez-Gonzalez. (2016). Imputation of non-response on economic variables in the Mexican Health and Aging Study (MHAS/ENASEM) 2012. In.
- R. Wong, K. Orozco-Rocha, D. Zhang and A. Michaels-Obregon. (2017). Imputation of non-response on economic variables in the Mexican Health and Aging Study (MHAS/ENASEM) 2015. In.
- X. Meng and C. D'Arcy. (2012). "Education and dementia in the context of the cognitive reserve hypothesis: a systematic review with meta-analyses and qualitative analyses", en: *PLoS One*, 7(6), e38268. doi:10.1371/journal.pone.0038268
- C. Diaz-Venegas, R. Samper-Terrent, A. Michaels-Obregon and R. Wong. (2019). "The effect of educational attainment on cognition of older adults: results from the Mexican Health and Aging Study 2001 and 2012", en: *Aging and Mental Health*, 23(11), 1586-1594. doi:10.1080/13607863.2018.1501663
- J. L. Saenz, C. R. Beam and E. M. Zelinski. (2020). "The Association between Spousal Education and Cognitive Ability among Older Mexican Adults", en: *Journals of Gerontology Series B Psychological Sciences and Social Sciences*. doi:10.1093/geronb/gbaa002
- M. Angrisani, J. Lee and E. Meijer. (2019). "The gender gap in education and late-life cognition: Evidence from multiple countries and birth cohorts", en: *The Journal of Economics of Ageing*, In Press. doi:10.1016/j.jeoa.2019.100232
- E. Whitley and J. Ball. (2002). "Statistics review 4: sample size calculations", en: *Crit Care*, 6(4), 335-41. doi:10.1186/cc1521
- M. B. Ofstedal, G. F. Gwenth and A. R. Herzog. (2005). HRS/AHEAD documentation report: Documentation of Cognitive Functioning Measures in the Health and Retirement Study. In U. o. Michigan (Ed.).
- World Health Organization. (2018). *Towards a dementia plan: A WHO guide*. In. Geneva: World Health Organization.

Supplemental Table 1

Continue

**Percentage of participants missing values for each cognitive variable in 2015 according to level of education**

| Cognitive measure, n (%) | Level of Education |                    |                   | p-value |
|--------------------------|--------------------|--------------------|-------------------|---------|
|                          | 0 years (n=2166)   | 1-6 years (n=6792) | 7+ years (n=4180) |         |
| Immediate recall         | 26 (1.2)           | 54 (0.8)           | 40 (1.0)          | 0.21    |
| Delayed recall           | 28 (1.3)           | 64 (0.9)           | 41 (1.0)          | 0.24    |
| Date naming              | 12 (0.6)           | 30 (0.4)           | 34 (0.8)          | 0.04    |
| Animal naming            | 19 (0.9)           | 53 (0.8)           | 40 (1.0)          | 0.61    |
| Figure copy              | 445 (20.5)         | 411 (6.1)          | 100 (2.4)         | < 0.01  |
| Figure copy, delayed     | 477 (22.0)         | 463 (6.8)          | 122 (2.9)         | < 0.01  |

**Percentage of participants missing values for each cognitive variable in 2015 according to level of education**

| Cognitive measure, n (%) | Level of Education  |                       |                      | p-value |
|--------------------------|---------------------|-----------------------|----------------------|---------|
|                          | 0 years<br>(n=2166) | 1-6 years<br>(n=6792) | 7+ years<br>(n=4180) |         |
| Visual scanning          | 453 (20.9)          | 412 (6.1)             | 103 (0.78)           | < 0.01  |
| Counting backwards       | 403 (18.6)          | 223 (3.3)             | 45 (1.1)             | < 0.01  |
| Serial 7s                | 1636 (75.5)         | 2567 (37.8)           | 503 (12.0)           | < 0.01  |

p-values from chi-square tests.

Supplemental Table 2

**Percentage of participants missing values for each cognitive variable in 2015 according to level of education**

| Variable, n (%)      | Age               |                   |                   |                 | p-value |
|----------------------|-------------------|-------------------|-------------------|-----------------|---------|
|                      | 50-59<br>(n=3615) | 60-69<br>(n=4780) | 70-79<br>(n=3361) | ≥80<br>(n=1349) |         |
| Immediate recall     | 25 (0.7)          | 37 (0.8)          | 33 (1.0)          | 25 (1.9)        | < 0.01  |
| Delayed recall       | 26 (0.7)          | 39 (0.8)          | 35 (1.0)          | 33 (2.4)        | < 0.01  |
| Date naming          | 17 (0.5)          | 24 (0.5)          | 19 (0.6)          | 16 (1.2)        | 0.02    |
| Animal naming        | 24 (0.7)          | 36 (0.8)          | 27 (0.8)          | 25 (1.9)        | < 0.01  |
| Figure copy          | 126 (3.5)         | 252 (5.3)         | 304 (9.0)         | 274 (20.3)      | < 0.01  |
| Figure copy, delayed | 136 (3.8)         | 283 (5.9)         | 338 (10.0)        | 305 (22.6)      | < 0.01  |
| Visual scanning      | 124 (3.4)         | 254 (5.3)         | 303 (8.9)         | 287 (21.3)      | < 0.01  |
| Counting backwards   | 89 (2.5)          | 171(3.6)          | 233(6.9)          | 178(13.2)       | < 0.01  |
| Visual scanning      | 928(25.7)         | 1458(30.5)        | 1468(43.3)        | 852(63.2)       | < 0.01  |
| Counting backward    | 89 (2.5)          | 171 (3.6)         | 233 (6.9)         | 178 (13.2)      | < 0.01  |
| Serial 7s            | 928 (25.7)        | 1458 (30.5)       | 1468 (43.3)       | 852 (63.2)      | < 0.01  |

p-values from chi-square tests.
